1 **Multimodal multilayer network centrality relates to executive functioning**

2 Lucas C. Breedt <sup>a</sup>, Fernando A. N. Santos <sup>a,b</sup>, Arjan Hillebrand <sup>c</sup>, Liesbeth Reneman <sup>d</sup>, Anne-Fleur van  
3 Rootselaar <sup>e</sup>, Menno M. Schoonheim <sup>a</sup>, Cornelis J. Stam <sup>c,f</sup>, Anouk Ticheler <sup>a</sup>, Betty M. Tijms <sup>g</sup>, Dick J.  
4 Veltman <sup>h</sup>, Chris Vriend <sup>a,h</sup>, Margot J. Wagenmakers <sup>h,i</sup>, Guido A. van Wingen <sup>j</sup>, Jeroen J. G. Geurts <sup>a</sup>,  
5 Anouk Schranter <sup>d</sup>, and Linda Douw <sup>a</sup>

6

- 7 <sup>a.</sup> Department of Anatomy and Neurosciences, Amsterdam UMC, Vrije Universiteit Amsterdam,  
8 Amsterdam Neuroscience, The Netherlands  
9 <sup>b.</sup> Institute of Advanced Studies, University of Amsterdam, The Netherlands  
10 <sup>c.</sup> Department of Clinical Neurophysiology and MEG Center, Amsterdam UMC, Vrije Universiteit  
11 Amsterdam, Amsterdam Neuroscience, The Netherlands  
12 <sup>d.</sup> Department of Radiology and Nuclear Medicine, Amsterdam UMC, University of Amsterdam,  
13 Amsterdam Neuroscience, The Netherlands  
14 <sup>e.</sup> Department of Neurology and Clinical Neurophysiology, Amsterdam UMC, University of  
15 Amsterdam, Amsterdam Neuroscience, The Netherlands  
16 <sup>f.</sup> Department of Neurology, Amsterdam UMC, Vrije Universiteit Amsterdam, Amsterdam  
17 Neuroscience, The Netherlands  
18 <sup>g.</sup> Alzheimer Center Amsterdam, Department of Neurology, Amsterdam Neuroscience, Amsterdam  
19 UMC, Vrije Universiteit Amsterdam, The Netherlands  
20 <sup>h.</sup> Department of Psychiatry, Amsterdam UMC, Vrije Universiteit Amsterdam, Amsterdam  
21 Neuroscience, The Netherlands  
22 <sup>i.</sup> GGZ inGeest Specialized Mental Health Care, Amsterdam, The Netherlands  
23 <sup>j.</sup> Department of Psychiatry, Amsterdam UMC, University of Amsterdam, Amsterdam Neuroscience,  
24 The Netherlands  
25

26

27 **Corresponding author:**

28 Lucas C. Breedt, email: [l.breedt@amsterdamumc.nl](mailto:l.breedt@amsterdamumc.nl), address: Amsterdam UMC, Location VUmc,  
29 Department of Anatomy & Neurosciences, De Boelelaan 1108, 1081 HZ Amsterdam

30

31

32

33

34 **Highlights:**

- 35 • Multimodal neuroimaging and neurophysiology data were collected in healthy adults  
36 • Multilayer frontoparietal centrality was positively associated with executive functioning  
37 • Unilayer (unimodal) centralities were not associated with executive functioning  
38 • There was an inverted-U relationship between multilayer centrality and age

39 **Keywords:** cognition, graph theory, functional connectivity, structural connectivity, multiplex networks,  
40 minimum spanning tree

41

42 **Abstract**

43 Executive functioning is a higher-order cognitive process that is thought to depend on a brain network  
44 organization facilitating network integration across specialized subnetworks. The frontoparietal network  
45 (FPN), a subnetwork that has diverse connections to other brain modules, seems pivotal to this  
46 integration, and a more central role of regions in the FPN has been related to better executive  
47 functioning. Brain networks can be constructed using different modalities: diffusion MRI (dMRI) can be  
48 used to reconstruct structural networks, while resting-state fMRI (rsfMRI) and magnetoencephalography  
49 (MEG) yield functional networks. These networks are often studied in a unimodal way, which cannot  
50 capture potential complementary or synergistic modal information. The multilayer framework is a  
51 relatively new approach that allows for the integration of different modalities into one ‘network of  
52 networks’. It has already yielded promising results in the field of neuroscience, having been related to  
53 e.g. cognitive dysfunction in Alzheimer’s disease. Multilayer analyses thus have the potential to help us  
54 better understand the relation between brain network organization and executive functioning. Here, we  
55 hypothesized a positive association between centrality of the FPN and executive functioning, and we  
56 expected that multimodal multilayer centrality would supersede unilayer centrality in explaining  
57 executive functioning. We used dMRI, rsfMRI, MEG, and neuropsychological data obtained from 33  
58 healthy adults (age range 22-70 years) to construct eight modality-specific unilayer networks (dMRI,  
59 fMRI, and six MEG frequency bands), as well as a multilayer network comprising all unilayer networks.  
60 Interlayer links in the multilayer network were present only between a node’s counterpart across layers.  
61 We then computed and averaged eigenvector centrality of the nodes within the FPN for every uni- and  
62 multilayer network and used multiple regression models to examine the relation between uni- or  
63 multilayer centrality and executive functioning. We found that higher multilayer FPN centrality, but not  
64 unilayer FPN centrality, was related to better executive functioning. To further validate multilayer FPN  
65 centrality as a relevant measure, we assessed its relation with age. Network organization has been  
66 shown to change across the life span, becoming increasingly efficient up to middle age and regressing  
67 to a more segregated topology at higher age. Indeed, the relation between age and multilayer centrality  
68 followed an inverted-U shape. These results show the importance of FPN integration for executive

69 functioning as well as the value of a multilayer framework in network analyses of the brain. Multilayer  
70 network analysis may particularly advance our understanding of the interplay between different brain  
71 network aspects in clinical populations, where network alterations differ across modalities.

72

73

74

75

76

77

78

79

80

81

82

83

84

85

86

87

88

89

90

91

92

93

94

95

96

97

98

99 **1. Introduction**

100 A thread of network thinking runs through the history of cognition research. In 1983, Fodor introduced  
101 the ‘modularity of mind’ theory of cognition and behavior [1]. He posited that lower-order processes of  
102 the mind are modular, with domain-specific modules operating independently without interacting with  
103 other modules. Contrastingly, he argued that higher-order cognitive processes such as executive  
104 functioning (EF), which is thought to be the most complex and evolutionarily special cognitive domain  
105 [2], are global rather than modular. Likewise, the evolution of neuroscience has led to a data-driven  
106 approach towards understanding how the brain governs such higher-order cognition by studying the  
107 brain as a complex network through the framework of graph theory [3, 4]. Brain regions are thus  
108 represented as nodes, and the interactions between them as links.

109 Different modalities can be used to obtain these brain networks. Anatomically, diffusion  
110 magnetic resonance imaging (dMRI) maps the physical connections (i.e. white matter bundles) between  
111 the neural elements of the brain, yielding a structural network. Functionally, multiple imaging techniques  
112 can be used to observe brain activity. Resting-state functional magnetic resonance imaging (rsfMRI)  
113 detects variations in blood oxygenation as an indirect measure of neuronal activity at a high spatial  
114 resolution, and magnetoencephalography (MEG) provides a direct measure of the summed  
115 electromagnetic activity generated by groups of neurons. In both rsfMRI and MEG, statistical  
116 interdependencies between levels of activity in different areas of the brain are used as a measure for  
117 functional connectivity [5, 6], yielding functional networks.

118 The organization of these structural and functional networks appears to be crucial for EF.  
119 Although the exact mechanisms underlying this cognitive function remain unknown [7], EF appears to  
120 be highly reliant on network integration, i.e. the interplay between specialized modules [8]. Key in  
121 facilitating this integration is the frontoparietal network (FPN), a module that plays a crucial central role  
122 as a ‘connector’ within the brain network, having diverse connections to other modules of the brain [9].  
123 The network integration that is hypothetically happening in the individual brain regions that form the FPN  
124 can be characterized through network measures of centrality. Nodal centrality reflects the relative  
125 importance of a node within the network. Highly central regions are typically connected to many other  
126 regions, implying a pivotal role in the facilitation of network integration [9, 10]. Indeed, a more central  
127 role of the FPN has been related to better EF in unimodal network studies that utilized dMRI [11], rsfMRI  
128 [12, 13], or MEG [14].

129           However, in such unimodal network studies the different aspects of the brain network, e.g.  
130 structural and functional, are only studied in isolation, while we know from other types of complex  
131 networks that network structure and different types of functional dynamics occurring on top of it jointly  
132 and synergistically determine system behavior [15-18]. In the brain, it remains unclear exactly how the  
133 integration between these network aspects relates to EF. Nevertheless, the interplay between structural  
134 and functional connectivity has been shown to be non-trivial, suggesting both should be considered  
135 simultaneously [19-21]. Moreover, in the case of networks based on MEG data, the broadband signal is  
136 often filtered into canonical frequency bands, and network analysis is performed for each frequency  
137 band separately, but the different imaging modalities and frequency bands each yield unique and even  
138 complementary information that should perhaps not be considered in isolation. Unimodal networks are  
139 thus limited representations of the essentially multimodal brain network [18, 22, 23]; but until recently  
140 we lacked the appropriate tools to integrate multiple modalities into a single network representation.

141           Multilayer network analysis is a newly developed mathematical framework that enables this  
142 integration and allows for analysis of multimodal data [15, 24, 25]. A multilayer network is a ‘network of  
143 networks’, comprised of multiple interconnected layers, each characterizing a different aspect of the  
144 same system. Figure 1 illustrates the concept of multilayer networks using the analogy of a commuter  
145 network. Although the framework of multilayer networks is relatively new in the field of neuroscience,  
146 promising results have already been reported. Multilayer analysis of dMRI and fMRI networks of healthy  
147 participants confirmed the synergistic nature of the structure and function of the brain network [26].  
148 Further relevance of multilayer analysis has been shown in clinical studies: multilayer connectivity  
149 differences were reported between patients with schizophrenia and healthy controls, and these  
150 differences were related to symptom severity [27]. Moreover, a study in schizophrenia and another study  
151 in Alzheimer’s disease suggested that multilayer centrality could outperform unilayer measures to  
152 distinguish cases from healthy controls [28, 29]. Additionally, an MEG study used nodal centrality metrics  
153 to identify brain regions that were vulnerable in patients with Alzheimer’s disease compared to healthy  
154 controls, and found that such regions could only be detected using a multilayer approach. Even more  
155 relevant to our work, this vulnerability of central regions in the multilayer network was related to cognitive  
156 dysfunction [30]. Multilayer network analysis can thus contribute to a better understanding of the relation  
157 between the FPN and EF.

158 Here, we used multimodal data to assess the association between FPN centrality and EF in  
159 healthy participants and explored the potential added value of a multilayer framework over a unilayer  
160 framework. We hypothesized 1) a positive association between FPN centrality of both the uni- and  
161 multilayer networks and EF, and 2) multilayer centrality superseding its unilayer equivalents in explaining  
162 individual differences in EF.

163

## 164 **2. Methods**

### 165 ***2.1. Participants***

166 This study was preregistered in the Netherlands Trial Register under trial ID NL7301. Thirty-nine (39)  
167 healthy participants were prospectively recruited for this specific study through an online platform,  
168 Hersenonderzoek.nl ([www.hersenonderzoek.nl](http://www.hersenonderzoek.nl)), where volunteers can register for participation in  
169 neuroscience studies. Participants were selected based on the following inclusion criteria: (1) age  
170 between 20 and 70 years old; (2) native Dutch speaker; (3) able to provide written informed consent.  
171 The following exclusion criteria were used: (1) history of neurological or psychiatric disease; (2) current  
172 and regular use of centrally acting drugs; (3) presence of contraindications for MRI or MEG. Participants  
173 were asked not to ingest any caffeine or alcohol on the testing days. Approval was obtained from the  
174 VU University Medical Center Medical Ethical Committee, and all subjects provided written informed  
175 consent prior to participation.

### 176 ***2.2. Neuropsychological evaluation***

177 Participants underwent an extensive customized neuropsychological test battery, consisting of the  
178 Dutch version of Rey's Auditory Verbal Learning Test [31], the Concept Shifting Test (CST; [32]), the  
179 Memory Comparison Test (MCT), the Stroop Color-Word Test (SCWT; [33]), the Location Learning Test  
180 (LLT; [34]), the Categorical Word Fluency Test [35], and the Letter-Digit Modalities Test (LDMT; [36]).  
181 We used (subscores on) three of these tests to assess EF. The first test we used was the CST, where  
182 the participant was shown 16 small circles, grouped in a large circle, containing either digits (CST part  
183 A), letters (CST part B), or both digits and letters (CST part C). These circles needed to be crossed out  
184 in ascending order in part A, in alphabetical order in part B, and in alternating order (digit-letter) in part  
185 C. The participant was asked to perform the test as quickly as possible without making mistakes.  
186 Additionally, to correct for motor speed, a null-condition with empty circles (CST zero) was carried out  
187 thrice. The second test we used was the SCWT, where the participant was asked to read four different

188 cards. On the first card, names of colors – red, green, yellow, and blue – were printed in black ink. On  
189 the second card, rectangles were printed in these same colors. On the third card, the names of the  
190 colors were printed in an inconsistent color ink; e.g. the word ‘red’ was printed in yellow ink, and the  
191 participant was asked to read the color of the ink and ignore the word. The fourth card was identical to  
192 the third card, but several words were circled. For these circled words, the participant was asked to read  
193 the word itself instead of the color of the ink. The third test we used was the Word Fluency Test, where  
194 the participant was asked to name as many words in the category ‘animals’ as possible within 60  
195 seconds.

196 Using validated norms of the CST [32], SCWT [37], and Word Fluency Test [37], raw scores  
197 were adjusted for sex, age, and education (classified according to the Dutch Verhage system [38] which  
198 ranges from level 1 [less than six years of primary education] to level 7 [university degree]) and  
199 transformed into z-scores. EF was defined as the average of z-scores for Word Fluency, Stroop-  
200 interference (time to complete card 3 corrected for the time to complete card 2), and CST-shift (time to  
201 complete card C minus the average time to complete cards A and B, adjusted for time to complete CST  
202 zero) [32].

### 203 **2.3. Magnetic resonance imaging**

204 MRI data were obtained using a 3T MRI system (Philips Ingenia CX) with a 32-channel receive-only  
205 head coil at the Spinoza Centre for Neuroimaging in Amsterdam, The Netherlands. A high-resolution  
206 3D T1-weighted image was collected with a magnetization-prepared rapid acquisition with gradient echo  
207 (MPRAGE; TR = 8.1ms, TE = 3.7ms, flip angle = 8°, voxel dimensions = 1 mm<sup>3</sup> isotropic). This  
208 anatomical scan was registered to MNI space through linear registration with nearest-neighbor  
209 interpolation, and was used for coregistration and normalization of all other modalities (dMRI, fMRI, and  
210 MEG) to the same space.

#### 211 **2.3.1. Diffusion MRI**

212 Diffusion MRI was collected with diffusion weightings of  $b = 1000$  and  $2000$  s/mm<sup>2</sup> applied in 29 and 59  
213 directions, respectively, along with 9 non-diffusion weighted ( $b = 0$  s/mm<sup>2</sup>) volumes using a multiband  
214 sequence (MultiBand SENSE factor = 2, TR = 4.7 s, TE = 95 ms, flip angle = 90°, voxel dimensions = 2  
215 mm<sup>3</sup> isotropic, no interslice gap). In addition, two scans with opposite phase encoding directions were  
216 collected for blip-up blip-down distortion correction using FSL topup [39]. Structural connectomes were  
217 constructed by performing probabilistic Anatomically-Constrained Tractography (ACT) [40] in MRtrix3

218 [41]. A tissue response function was estimated from the pre-processed and bias field corrected dMRI  
219 data using the multi-shell multi-tissue five-tissue-type algorithm (msmt\_5tt). Subsequently, the Fiber  
220 Orientation Distribution (FOD) for each voxel was determined by performing Multi-Shell Multi-Tissue  
221 Constrained Spherical Deconvolution (MSMT-CSD) [42]. ACT was performed by randomly seeding 100  
222 million fibers within the white matter to construct a tractogram, and Spherical-deconvolution Informed  
223 Filtering of Tractograms (SIFT, SIFT2 method in MRtrix3) [43] was then performed to improve the  
224 accuracy of the reconstructed streamlines and reduce false positives. For every participant, their  
225 respective 3D T1-weighted image was used to parcellate the brain into 210 cortical Brainnetome atlas  
226 (BNA) [44] regions. We then used this parcellation to convert the tractogram to a structural network,  
227 where weighted edges represented the sum of all streamlines leading to and from all voxels within two  
228 brain regions.

### 229 **2.3.2. Resting-state functional MRI**

230 Resting-state fMRI was collected using a multiband sequence (MultiBand SENSE factor = 2, TR  
231 = 1.52 s, TE = 30 ms, flip angle = 70°, voxel size = 2.5 x 2.5 x 2.75 mm<sup>3</sup>, interslice gap = 0.25 mm, 310  
232 volumes, 12-min acquisition). Participants were instructed to remain awake with their eyes open. Pre-  
233 processing was done using FSL 5 (FMRIB 2012, Oxford, United Kingdom, <http://www.fmrib.ox.ac.uk/fsl>)  
234 and included brain extraction, removal of the first four volumes, motion correction by regressing out six  
235 motion parameters, and spatial smoothing at 5 mm full-width-half-maximum (FWHM). An independent  
236 component analysis was performed for Automatic Removal of Motion Artefacts (ICA-AROMA) [45],  
237 followed by regressing out white matter and cerebrospinal fluid signals and high-pass filtering (100 s  
238 cutoff). Mean absolute motion did not exceed 0.6 mm for any participant; the median was 0.27 mm  
239 (0.08-0.59 mm). The rsfMRI data were registered to native 3D T1 space using boundary-based  
240 registration. The BNA atlas was then reverse-registered to each participant's functional data using  
241 nearest-neighbor interpolation. For every participant, a mask containing only grey matter voxels with  
242 reliable rsfMRI signal was constructed by combining a grey matter mask and an rsfMRI mask, excluding  
243 all voxels with a signal intensity in the lowest quartile of the robust range (see [46] for more details).  
244 Time-series were extracted from all atlas regions by averaging time-series across all voxels within each  
245 region. Thirteen regions with signal loss (i.e. regions with zeros in the functional connectivity matrices)  
246 due to magnetic field inhomogeneities in these echo-planar imaging (EPI) sequences were removed  
247 from further analyses across all participants and modalities. Thus, 197 atlas regions remained for all



248 further analyses. Finally, for every participant, Pearson correlation coefficients between all pairs of time-  
249 series were calculated to obtain a functional connectivity matrix. Correlation coefficients were  
250 absolutized, as most network metrics do not take into account negative values, but inverse correlations  
251 may carry relevant information [47, 48].

#### 252 **2.4. Magnetoencephalography**

253 MEG data were recorded in a magnetically shielded room (Vacuumschmelze GmbH, Hanau, Germany)  
254 using a 306-channel (102 magnetometers and 204 gradiometers) whole-head MEG system (Elekta  
255 Neuromag Oy, Helsinki, Finland) with a sampling frequency of 1250 Hz during a no-task, eyes-closed  
256 condition for five minutes, an eyes-open condition for two minutes, and a final eyes-closed condition for  
257 another five minutes, with the participant in supine position. Here, we used only the first eyes-closed  
258 recording for all further analyses. An anti-aliasing filter of 410 Hz and a high-pass filter of 0.1 Hz were  
259 applied online. The cross-validation Signal Space Separation (xSSS) [49] was applied to aid visual  
260 inspection of the data. We removed channels containing no signal or noisy signal, with a maximum of  
261 12 channels removed per participant. Further noise removal was performed offline using the temporal  
262 extension of Signal Space Separation (tSSS) [50] in MaxFilter (version 2.2.15). The head position  
263 relative to the MEG sensors was recorded continuously using the signals from five head-localization  
264 coils. Coil positions and the scalp outline were digitized using a 3D digitizer (Fastrak, Polhemus,  
265 Colchester, VT, USA). A surface-matching procedure was used to achieve co-registration of the  
266 participant's digitized scalp surface and their anatomical MRI, with an estimated resulting accuracy of 4  
267 mm [51]. A single best-fitting sphere was fitted to the outline of the scalp as obtained from the co-  
268 registered MRI, which was used as a volume conductor model for the beamformer approach described  
269 below. The co-registered MRI was spatially normalized to a template MRI, and the voxels in the  
270 normalized co-registered MRI were again labeled according to the same atlas. We then used a scalar  
271 beamforming approach [52] to reconstruct the source of neurophysiological activity from the sensor  
272 signal. The beamformer weights were based on the lead fields, the broadband (0.5-48 Hz) data  
273 covariance, and noise covariance. The data covariance was based on, on average, 298 s of data (range  
274 293-314 s). A unity matrix was used noise covariance. Broadband data were then projected through the  
275 normalized beamformer weights to obtain time-series for each atlas region. Out of all the voxels that  
276 constitute an atlas region, the centroid [53] was selected to reconstruct localized MEG activity, resulting  
277 in time-series for each of the 197 included cortical regions. For all participants, we included the first 88

278 epochs of 4096 samples (3.28s) of the obtained time-series (total length 4 minutes and ~48 seconds).  
279 Fast Fourier transforms were applied to filter the time-series into six frequency bands: delta (0.5-4 Hz),  
280 theta (4-8 Hz), lower alpha (8-10 Hz), upper alpha (10-13 Hz), beta (13-30 Hz), and gamma (30-48 Hz).  
281 We then computed the phase lag index (PLI) [54] between the frequency-filtered time-series of all pairs  
282 of regions using custom-made scripts in MATLAB (R2018b, Mathworks, Natick, MA, USA) to obtain  
283 weighted functional connectivity matrices.

#### 284 **2.5. Unilayer network construction and analysis**

285 First, we constructed minimum spanning trees (MST) for the six frequency-band specific MEG networks  
286 by applying Kruskal's algorithm [55] to the functional connectivity matrices. The MST is a binarized sub-  
287 graph of the original graph that connects all the nodes in the network without forming loops. This  
288 represents the backbone of the network [56, 57] and, importantly, is not hindered by common  
289 methodological issues such as effects of connection strength or link density on the estimated topological  
290 characteristics of networks [57]. Edge weights were defined as the inverted PLI values ( $1/PLI$ ) when  
291 constructing the *minimum* spanning tree, since we were interested in the strongest connections [58].

292 We then calculated nodal eigenvector centrality (EC) individually for each of the six MEG MSTs,  
293 and for the fully connected weighted dMRI and rsfMRI connectivity matrices, using the brain connectivity  
294 toolbox (<https://sites.google.com/site/bctnet/>) in MATLAB. EC is a measure of nodal centrality that  
295 assumes that a node is more influential if it is connected to nodes that are highly central themselves,  
296 and thus considers both the connections of a node itself as well as the connections of its neighbors.  
297 This makes it an interesting measure of centrality that takes the entire network into account, and it has  
298 been shown to be highly relevant for cognition in studies using dMRI [59], rsfMRI [46], and MEG [60].  
299 For a more detailed explanation of the EC and its mathematical definition, see [61].

300 Finally, we extracted and subsequently averaged the ECs of all nodes belonging to the FPN to  
301 obtain one value per unilayer network per participant (for a total of eight values per participant). Regions  
302 belonging to the FPN were defined based on an earlier categorization [62] of the regions of the BNA  
303 according to the classical seven-network parcellation by Yeo and colleagues [63].

#### 304 **2.6. Multilayer network construction and analysis**

305 A multiplex network is a multilayer network used to describe different interactions between the same set  
306 of nodes [64]. In this context, each layer is characterized by a different modality of interaction. Therefore,  
307 this mathematical framework is useful to encode information from brain networks created using different

308 edge weights or imaging modalities as long as all layers are built using the same atlas. In such a  
309 multiplex network, links between different layers, also known as interlayer links, exclusively connect the  
310 same node or brain region across layers.

311 There is, as of yet, no established method for determining biologically meaningful weighted  
312 interlayer links between different modalities. Additionally, network metrics can potentially be biased by  
313 differences in link density and average connectivity across layers and between participants [23]. Here,  
314 we therefore decided to construct binary multiplex networks. Consequently, in addition to the MEG MSTs  
315 described in section 2.5, we used Kruskal's algorithm to construct MSTs for the dMRI and rsfMRI data.  
316 We then integrated these eight MSTs to obtain an interconnected multiplex network for every participant.  
317 Each participant's multiplex thus consisted of  $L = 8$  layers (one for dMRI, one for rsfMRI, and one for  
318 each of the six MEG frequency bands), with each layer containing the same set of  $N = 197$  nodes (atlas  
319 regions), and each spanning tree and thus layer having  $M = N - 1 = 196$  intralayer links. The weights of  
320 the interlayer connections were set to 1, identical to the intralayer connections. The resulting multilayer  
321 network was represented as an  $L \times N$  by  $L \times N$  supra-adjacency matrix (see Figure 2) with diagonal blocks  
322 encoding intralayer connectivity for each modality and off-diagonal blocks encoding interlayer  
323 connectivity. Supra-adjacency matrices were then exported to Python (version 3.6, Python Software  
324 Foundation, available at <http://www.python.org>), and multilayer nodal EC (see [64] for a mathematical  
325 definition) was computed using custom-made scripts that integrate the Python libraries multiNetX [65]  
326 and NetworkX (version 2.3) [66] that can be found on GitHub (<https://github.com/nkoub/multinetx> and  
327 <https://github.com/networkx>, respectively). Note that EC was first computed for each node in each layer  
328 separately and subsequently aggregated across layers to obtain one value per node, as described  
329 earlier [67]. We then again extracted and averaged ECs of the FPN nodes, yielding one value for  
330 multilayer EC per participant. A schematic overview of the methods can be found in Figure 2; Figure 3  
331 shows an example multiplex network as constructed using these methods. All of the custom-made  
332 scripts, as well as the data that we used in this study, can be found on our lab's GitHub page  
333 (<https://github.com/multinetlab-amsterdam/projects/tree/master/mumo>).

## 334 **2.7. Statistical analyses**

335 To assess the relation between uni- or multilayer EC of the FPN and age, sex and education-corrected  
336 EF scores, we performed a multiple regression analysis in SPSS (version 26, IBM Corp., Armonk, NY,  
337 USA). With EF as the dependent variable, average EC values of the FPN of each of the eight unilayer

338 networks described in section 2.5 were added in a first block using a backward stepwise procedure (F  
339 probability for removal 0.10), and the average EC of the FPN of the multilayer network was entered in a  
340 second block. To assess whether these data met the assumption of collinearity, we computed bivariate  
341 correlations between all average unilayer EC values of the FPN, and additionally ran collinearity  
342 diagnostics.

343

### 344 **3. Results**

#### 345 **3.1. Participant characteristics**

346 Of the 39 included participants, two participants dropped out before completion of the study, two were  
347 excluded during the study because of contra-indications for MRI, and another two were excluded after  
348 visual inspection of their MRI data revealed artifacts. This resulted in a total of 33 included participants  
349 with complete structural MRI, dMRI, rsfMRI, MEG, and neuropsychological data that were used in the  
350 analyses. Of these participants, 18 were female and 15 were male. They were well spread out in terms  
351 of age, ranging between 22 and 70 years old, with a mean age of  $46 \pm 17$  years. Participants were  
352 mainly higher-educated.

#### 353 **3.2. Network correlates of executive functioning**

354 Figure 4 shows a raincloud plot with the distribution of EF z-scores for all participants. Importantly, as  
355 indicated by the wide range of normed z-scores, our sample was diverse in terms of EF performance.  
356 There was no evidence of multicollinearity between network variables: absolute correlation coefficients  
357 between the unilayer network eigenvector centralities did not exceed 0.7, and tolerance values were all  
358 greater than 0.1. Figure 5 shows, for one participant, exemplar values of EC for the multilayer network,  
359 as well as all the unilayer networks and the mean of the unilayers.

360 Testing our hypotheses, none of the unilayer network eigenvector centralities survived the  
361 backwards stepwise selection, see Table 1 for the coefficients of the included and excluded variables.  
362 The final regression model, containing only multilayer EC of the FPN as a predictor of EF, was  
363 statistically significant ( $R^2 = .133$ , adjusted  $R^2 = .105$ ,  $F[1, 31] = 4.753$ ,  $p = .037$ ). There was no significant  
364 increase in  $R^2$  from the second-to-last model, containing two predictors (unilayer EC in the lower alpha  
365 band and multilayer EC), to this final significant model. These results suggest that only EC of the FPN  
366 of the multilayer network was a significant predictor of EF, and that a higher multilayer EC of the FPN  
367 was related to better EF (see Figure 6).

368 Repeating these analyses using a forward stepwise procedure (F probability for entry 0.05) resulted  
369 in an identical final model, containing only multilayer EC as a predictor of EF and was significant ( $R^2 =$   
370  $.133$ , adjusted  $R^2 = .105$ ,  $F[1, 31] = 4.753$ ,  $p = .037$ ).

### 371 **3.3. Multilayer network correlates of age**

372 To further validate the relevance of multilayer FPN centrality, we tested its relationship with age. Unilayer  
373 network studies have revealed that the brain network tends to become more efficiently integrated in  
374 early life [68], after which its development plateaus during middle age [69] and subsequently regresses  
375 to a less integrative topology with older age [70]. This relation is also reflected in changes in for example  
376 whole brain- [71] and white matter volume [72, 73] across the lifespan, and the effects of age on the  
377 development of neurological disease, e.g. in multiple sclerosis [74] or Alzheimer's disease [75], is well-  
378 established. We therefore hypothesized an inverted-U relation between age and multilayer EC of the  
379 FPN. We employed a hierarchical multiple regression model with multilayer centrality as the dependent  
380 variable. Age was entered in a first block, and the square of age was added to the model in a second  
381 block. We used an alpha level of .05 for all statistical tests. Both regression models were checked for  
382 normality of residuals using a Q-Q plot.

383 See figure 4 for a raincloud plot of multilayer centrality, showing the distribution of multilayer network  
384 EC of the FPN for all participants. The final model with both age and age squared indicated a statistically  
385 significant quadratic relation between age and multilayer EC of the FPN ( $R^2 = .289$ , adjusted  $R^2 = .241$ ,  
386  $F[2, 30] = 6.082$ ,  $p = .006$ ). The square of age added significantly to the model, leading to an increase  
387 in  $R^2$  of  $.140$  ( $F[1, 30] = 5.915$ ,  $p = .021$ ), suggesting indeed that the quadratic model more accurately  
388 explained age variations than the simple linear model. The coefficients of the included variables are  
389 reported in Table 1; Figure 6 shows the relation between age and multilayer EC of the FPN.

390

## 391 **4. Discussion**

392 We studied how multilayer centrality of the FPN was related to individual differences in EF, and  
393 whether this provided additional information to modality- and frequency-specific unilayer FPN centrality.  
394 We found that higher multilayer FPN centrality related to better EF, whereas FPN centrality of unilayer  
395 networks did not significantly explain differences in EF between healthy adults. Finally, *post hoc*  
396 analyses established an inverted-U relationship between age and multilayer centrality of the FPN.

397           Firstly, at least for the multilayer network, these results are in line with other studies displaying  
398 the importance of FPN network centrality for EF. The relation between FPN centrality and, by extension,  
399 network integration and cognition has been well-established in unilayer networks, using different  
400 neuroimaging and neurophysiological modalities. Increased integration of the FPN within the entire brain  
401 network specifically has been related to better EF in studies utilizing dMRI [11], rsfMRI [12, 13], and  
402 MEG [14]. While network segregation is thought to enable fast processing of lower-order information  
403 (e.g. analysis of visual inputs) [76], highly central nodes like those within the FPN facilitate global  
404 communication between these segregated communities, presumably enabling higher-order cognitive  
405 processes and specifically EF (see e.g. [9, 77]).

406           Moreover, our results demonstrate the relevance of multimodal network analysis through a  
407 multilayer network approach in explaining cognitive variance. While FPN centrality of the unimodal  
408 networks did not relate significantly to EF, higher FPN centrality of the multilayer networks was indeed  
409 associated with better EF. Visual exploration of our data confirmed that the level of integration per node  
410 depends on the modality on which the network is based, and that this is again different for the multilayer  
411 network. Central nodes (i.e. nodes with high EC) in the multilayer network are thus not the same as  
412 central nodes in the monolayer networks (see Figure 5). Other multilayer studies have similarly reported  
413 that the precise node that can be considered most central in an unilayer network, may not serve as the  
414 most central node in a multilayer network and vice versa [29, 30]. We build upon these studies by  
415 demonstrating that multimodal information captures variance in EF that networks obtained from a single  
416 modality do not.

417           Finally, the quadratic relation between age and multilayer centrality possibly reflects the rise and  
418 decline of brain network efficiency across the life span, and is in line with findings from studies reporting  
419 on unimodal data. Unilayer brain networks have been shown to become more segregated or modular  
420 during development [78], and connectivity of highly central regions has been reported to increase from  
421 childhood to adulthood [68], suggesting that the brain network becomes increasingly efficient with  
422 maturation. However, after a certain age, modularity of the network seems to decrease [70], indicating  
423 a degradation of the efficiency of the brain network. Moreover, a similar plateauing of brain network  
424 efficiency around middle age has been reported in the organization of the 'rich club' [69]. We have shown  
425 here that this characteristic of the brain network is maintained in a multilayer network, showing that FPN  
426 centrality of the multilayer network is an age-relevant metric. Note that we corrected EF scores for age,

427 such that the association we find between EF and multilayer centrality cannot be ascribed to age effects  
428 alone. However, larger datasets are needed to disentangle the exact relationship between age, network  
429 centrality, and EF.

430 The biological interpretation of the multilayer network used in this work deserves further  
431 consideration. Importantly, the spatial definition of nodes is identical across layers: the nodes in each  
432 modality were defined based on the same brain regions. The use of the brainnetome atlas, which is  
433 based on both structural- and functional connectivity pattern similarity within and across brain regions,  
434 further supports the assumption that these nodes can indeed be seen as canonical units across layers.  
435 We then used interlayer links between the same brain regions (nodes) across layers to integrate different  
436 modalities. The biological assumption here is that structure and function conflate maximally within the  
437 same brain region. There is ample evidence that this assumption holds across macroscopic modalities  
438 when correlating, for instance, structural and rsfMRI connectivity patterns across the whole brain [20,  
439 22, 79]. The spatial variation that exists in nodal correlations between structural and functional  
440 connectivity [80], however, may indicate that although this connectivity is highest within the same region  
441 instead of between regions, the linkage between layers varies per region. Such variations were not taken  
442 into account in the current work, where we used MSTs of the individual layers for the construction of  
443 multiplex networks and set the weights of all interlayer connections in the multilayer networks to one.  
444 Future studies may therefore incorporate weighted interlayer links to represent the spatial variation in  
445 within-region correlations across modalities. Another potential shortcoming of the binarization of link  
446 weights is that it eliminates layer dominance [81]: some layers may have a stronger influence on  
447 multilayer network characteristics than others, but when all layers carry the same importance, this  
448 information is lost. However, just as some layers may drive the properties of the multilayer more strongly  
449 than other layers, other layers may play a negligible role. This raises the question whether all possible  
450 layers should be included, or whether an a priori selection should be made – and if so, how this selection  
451 should be made. A first foray into this issue was made in a dataset of social contacts [82], but the layer  
452 selection problem in multimodal brain networks warrants further exploration. Furthermore, although  
453 interlayer connectivity may be maximal within brain regions, there is potential connectivity between  
454 different regions across different modalities-- i.e., cross-talk between node A in modality X and node B  
455 in modality Y may be relevant to overall functioning of the network. A general multilayer network  
456 formulation allows interlayer links between all nodes in all layers (see e.g. [64]). However, multimodal

457 datasets present considerable challenges when constructing a full multilayer network. Chief among them  
458 is determining biologically meaningful interlayer links between different modalities at the individual  
459 participant level. Additionally, a recent modelling study revealed that interlayer connectivity is driven  
460 mostly by one-to-one (i.e. multiplex) connections [83], and as evidenced by previous empirical studies  
461 [29, 30], a multiplex approach is therefore a logical and intuitive first step for analyzing multidimensional  
462 data. Lastly, we defined the FPN based on a predefined classification. As such, the FPN was comprised  
463 of the same regions across the different unilayers as well as in the multilayer network. However,  
464 subnetworks like the FPN and the hubs within them have been found to vary depending on the modality  
465 used [22, 84], and have also been shown to be different in a multiplex compared to a unilayer network  
466 [29]. Additionally, there is a large individual variability in the functional topography of the FPN [85]. A  
467 more data-driven approach to the formulation of the FPN may therefore further increase the explanatory  
468 power of the multilayer approach.

469         Some additional limitations need to be taken into consideration. It is particularly important to  
470 take into account the relatively small sample size of the present study: the absence of any unilayer  
471 effects could be due to a lack of statistical power, rather than the true absence of any correlations  
472 between unilayer network metrics and cognition. Potentially related to this limited sample size, the model  
473 containing only the significant multilayer predictor was not significantly better than the model containing  
474 a nonsignificant unilayer plus the multilayer predictor in terms of its explanatory value. Despite the  
475 significant association between multilayer FPN centrality and EF, we therefore cannot conclude with  
476 certainty that multilayer FPN centrality is more valuable than unilayer FPN centrality in explaining EF  
477 based on this study. Also, for the unilayer analyses, we computed network metrics based on the MSTs  
478 of the MEG networks but utilized the fully connected weighted networks of the dMRI and rsfMRI data.  
479 We made this choice to conform with previous modality-specific literature (e.g. [58, 86, 87]).

480

## 481 **5. Conclusions**

482 Integration of multimodal brain networks through a multilayer framework relates to EF in healthy adults,  
483 and corroborates known brain associations with aging. These findings underline the relevance of a  
484 multimodal view on integration of the brain network as a correlate of EF. Furthermore, the multilayer  
485 approach may be of particular interest in populations where network alterations differ across modalities.  
486 For instance, early neurodegeneration and structural network deterioration of particularly the most



487 central regions in the brain are initially associated with increases in functional communication, after  
488 which the functional brain networks seems to collapse [88, 89]. Multilayer network analysis may advance  
489 our understanding of the interplay between structural and different functional network aspects in such  
490 clinical populations.

491

#### 492 **Acknowledgements**

493 The authors would like to thank the Amsterdam Neuroscience research institute for supporting this  
494 study. We would also like to thank Hersenonderzoek.nl, a Dutch online registry that facilitates participant  
495 recruitment for neuroscience studies ([www.hersenonderzoek.nl](http://www.hersenonderzoek.nl)). Hersenonderzoek.nl is funded by  
496 ZonMw-Memorabel (project no 73305095003), a project in the context of the Dutch Deltaplan Dementie,  
497 Gieskes-Strijbis Foundation, the Alzheimer's Society in the Netherlands and Brain Foundation  
498 Netherlands. We thank the laboratory technicians of the Amsterdam UMC, Department of Clinical  
499 Neurophysiology and MEG Center, as well as the scan assistants of the Spinoza Centre for  
500 Neuroimaging, for the data acquisition. Finally, we thank all participants for their participation.

501

502

503

504

505

506

507

508

509

510

511

512

513

514

515

516

517 **Figures & Tables**

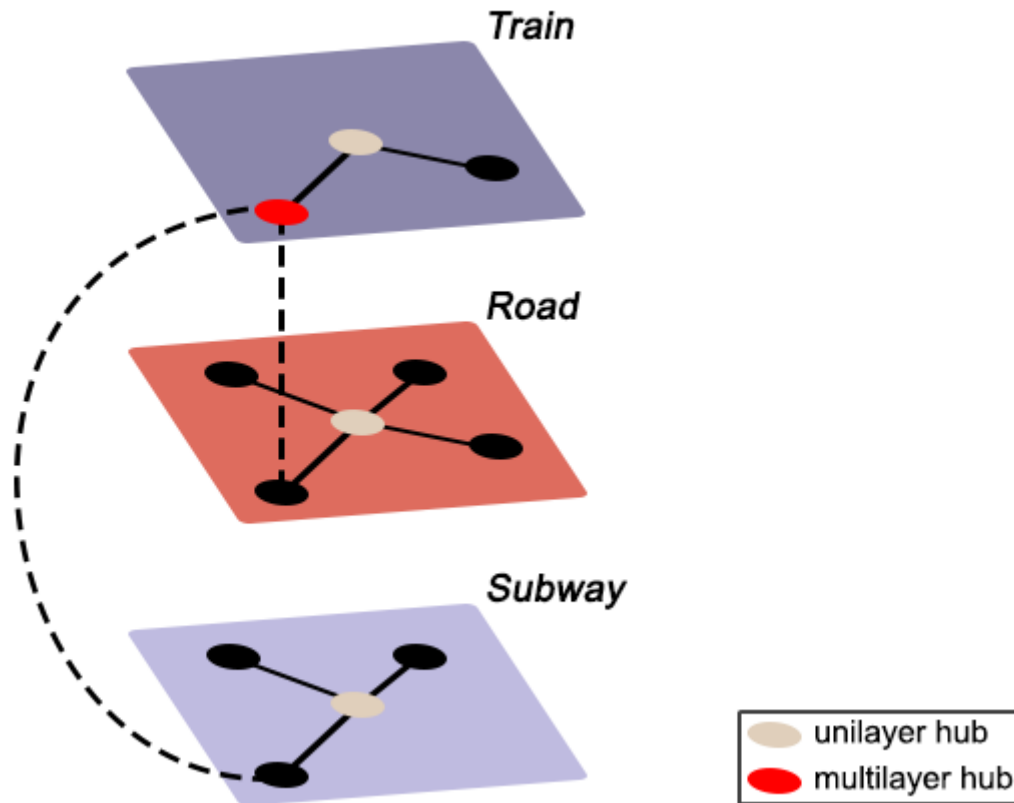

518

519 *Figure 1.* Example of a multilayer transport network, encoding information about train, subway, and road  
520 connectivity, and the interlayer links between them. Suppose there is a sudden increase in commuters  
521 in the subway network in the absence of any delayed or cancelled subway cars or suspended subway  
522 stations. Considering the unilayer subway network in isolation, the observed spike in commuters would  
523 seem inexplicable, as the properties of the subway network (i.e. the links and nodes) are unaltered.  
524 However, observing the entire transport system might reveal severe delays in the train network, forcing  
525 people who usually commute by train to now use the subway, thus leading to an increase in commuters  
526 in the subway network. Likewise, consider the red node in the train network. From a unilayer perspective,  
527 this is a peripheral station that is of little importance to the transport system. However, the multilayer  
528 perspective reveals this to be the only location where all three modes of transport connect, and the  
529 seemingly peripheral station thus plays a significant integrative role in the transportation network – a  
530 property that would have remained unnoticed without incorporating all the layers of the system.

531

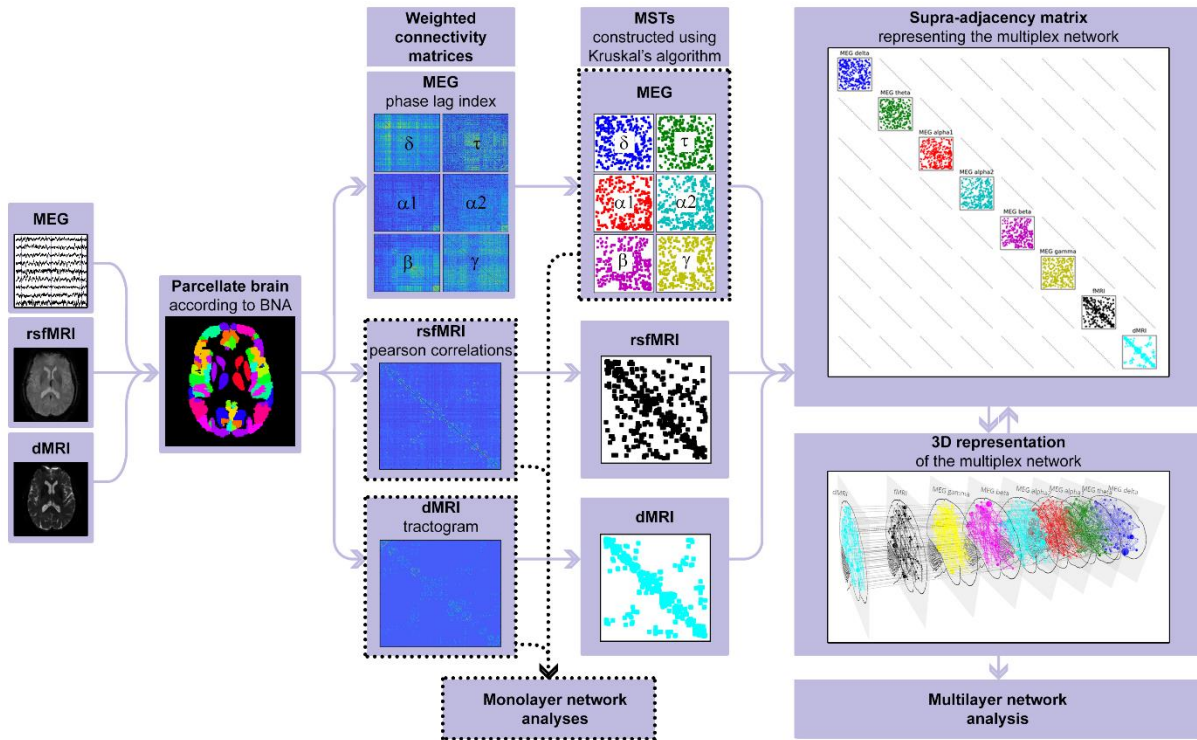

532

533 *Figure 2.* Schematic overview of the analysis pipeline. For every participant, raw imaging data obtained

534 from diffusion MRI, resting-state functional MRI, and magnetoencephalography was pre-processed; the

535 brain was parcellated according to the brainnetome atlas; connectivity was calculated to construct

536 weighted connectivity matrices; minimum spanning trees of the weighted matrices were constructed

537 using Kruskal's algorithm; and finally a supra-adjacency matrix representing a multilayer network was

538 constructed. Note that unilayer network measures were computed on the minimum spanning trees of

539 the magnetoencephalography frequency bands, but weighted data was used for diffusion MRI and

540 resting-state functional MRI. MEG = magnetoencephalography. rsfMRI = resting-state functional MRI.

541 dMRI = diffusion MRI. BNA = brainnetome. MST = minimum spanning tree.

542

543

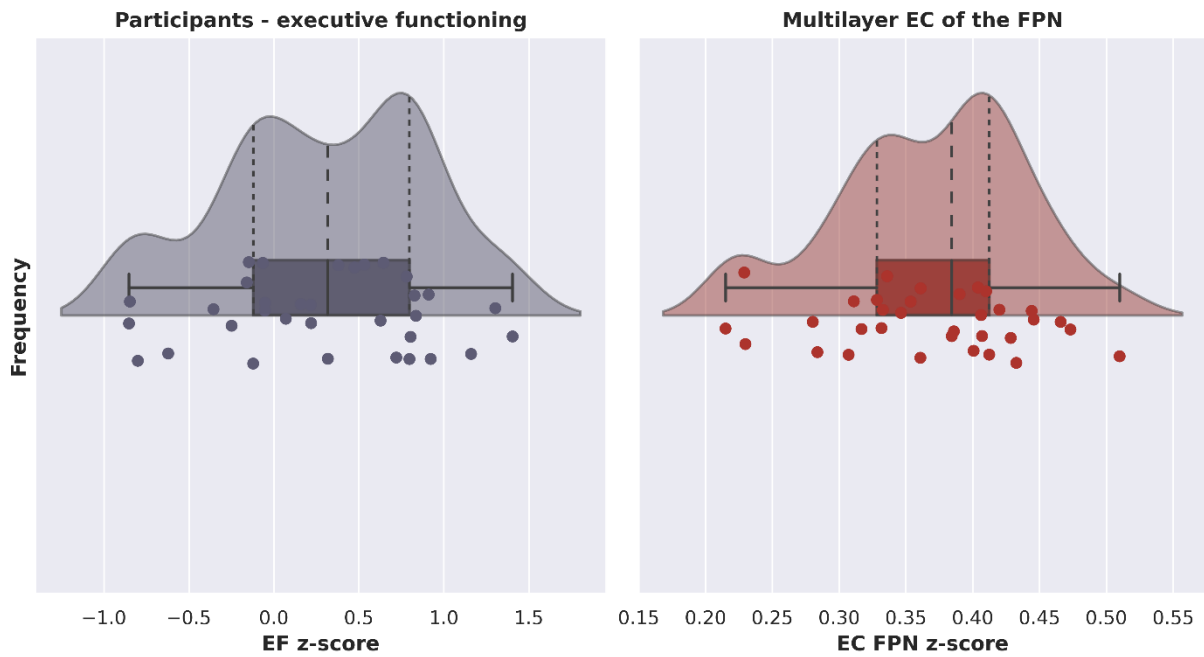

544

545 *Figure 3.* Raincloud plots showing probability density, summary statistics, and individual datapoints of  
546 the z-score per participant of executive functioning (left) and multilayer eigenvector centrality of the  
547 frontoparietal network (right). EF = executive functioning. EC = eigenvector centrality. FPN =  
548 frontoparietal network.

549

550

551

552

553

554

555

556

557

558

559

560

561

562

563

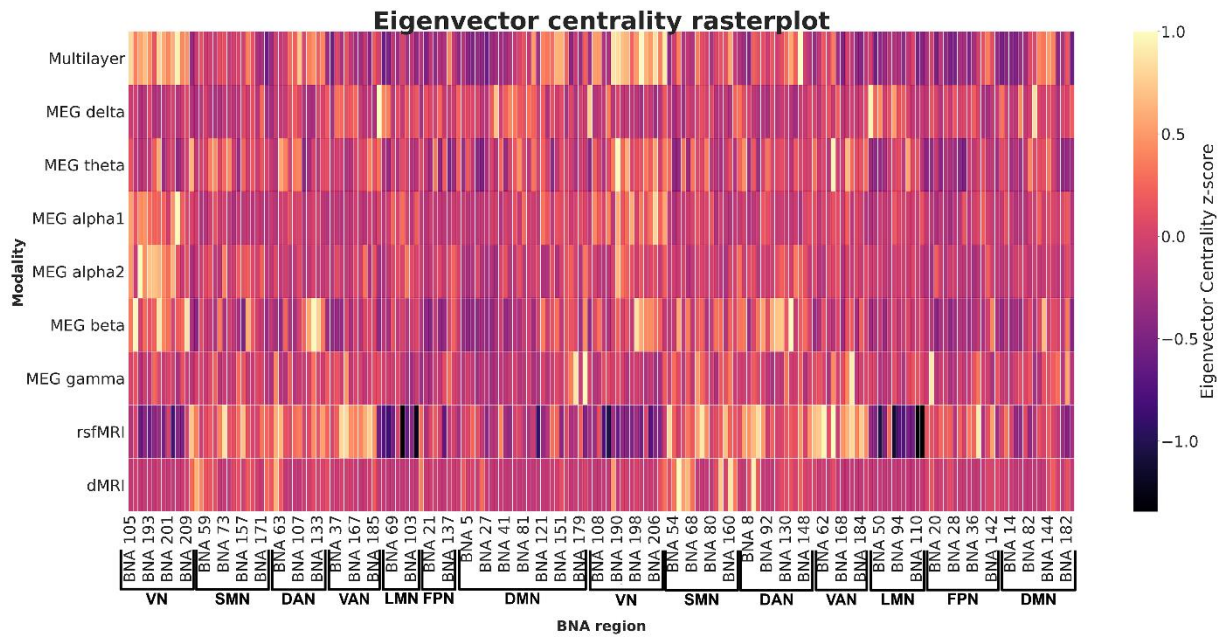

564

565 *Figure 4.* Rasterplot showing multilayer eigenvector centrality in the eight unilayer networks and the  
566 multilayer network, ordered by subnetwork (all left-hemisphere regions followed by all right-hemisphere  
567 regions). Yellow indicates regions with high EC. This shows the differences in 'centrality profiles' across  
568 modalities. BNA region numbers refer to the labels as given in Supplementary Table 1. MEG =  
569 magnetoencephalography. rsfMRI = resting-state functional MRI. dMRI = diffusion MRI. BNA =  
570 brainnetome atlas. VN = visual network. SMN = somatomotor network. DAN = dorsal attention network.  
571 VAN = ventral attention network. LMN = limbic network. FPN = frontoparietal network. DMN = default  
572 mode network.

573

574

575

576

577

578

579

580

581

582

583

584

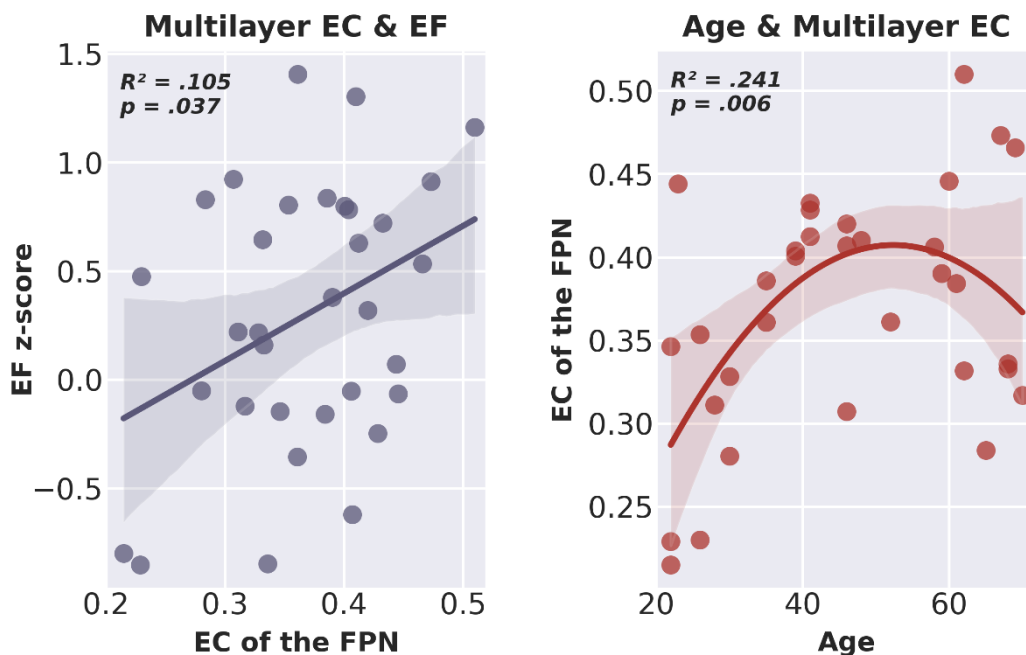

585

586 *Figure 5.* Scatterplot including line of best fit of multilayer eigenvector centrality of the frontoparietal  
587 network and executive functioning (left) and age and multilayer eigenvector centrality of the  
588 frontoparietal network (right). EC = eigenvector centrality. EF = executive functioning. FPN =  
589 frontoparietal network.

590

591

592

593

594

595

596

597

598

599

600

601

602

603

604

605 Table 1

606 *Standardized Beta coefficients p-values of included and excluded variables of the regression models.*

607 *Top: multilayer eigenvector centrality of the frontoparietal network and executive functioning. Bottom:*

608 *age and multilayer eigenvector centrality of the frontoparietal network. EC = eigenvector centrality. FPN*

609 *= frontoparietal network. EF = executive functioning. MEG = magnetoencephalography. dMRI = diffusion*

610 *MRI. rsfMRI = resting-state functional MRI. \* indicates significance at the  $p < 0.05$  level.*

| <b>Multilayer EC of the FPN &amp; EF</b>           |                           |                 |
|----------------------------------------------------|---------------------------|-----------------|
|                                                    | <b><math>\beta</math></b> | <b><i>P</i></b> |
| <b>Final model (<math>R^2_{adj} = .105</math>)</b> |                           |                 |
| Multilayer EC                                      | .365                      | .037*           |
| <b>Excluded variables</b>                          |                           |                 |
| EC MEG delta                                       | .047                      | .798            |
| EC MEG upper alpha                                 | .056                      | .752            |
| EC dMRI                                            | .074                      | .669            |
| EC MEG theta                                       | -.065                     | .716            |
| EC rsfMRI                                          | .097                      | .587            |
| EC MEG beta                                        | .144                      | .407            |
| EC MEG gamma                                       | -.204                     | .234            |
| EC MEG lower alpha                                 | -.238                     | .163            |
| <b>Age &amp; multilayer EC of the FPN</b>          |                           |                 |
|                                                    | <b><math>\beta</math></b> | <b><i>P</i></b> |
| <b>Final model (<math>R^2_{adj} = .241</math>)</b> |                           |                 |
| Age                                                | .014                      | .010*           |
| Age squared                                        | .00013                    | .021*           |

611

612

613

614

615

616

617 **References**

- 618 1. Fodor, J.A., *The modularity of mind*. 1983: MIT press.
- 619 2. Ardila, A., *On the evolutionary origins of executive functions*. Brain and cognition, 2008. **68**(1):  
620 p. 92-99.
- 621 3. Barabási, A.-L., *Network science*. 2016: Cambridge university press.
- 622 4. Bullmore, E. and O. Sporns, *Complex brain networks: graph theoretical analysis of structural*  
623 *and functional systems*. Nature reviews neuroscience, 2009. **10**(3): p. 186-198.
- 624 5. Aertsen, A., et al., *Dynamics of neuronal firing correlation: modulation of "effective*  
625 *connectivity"*. Journal of neurophysiology, 1989. **61**(5): p. 900-917.
- 626 6. Friston, K., et al., *Functional connectivity: the principal-component analysis of large (PET)*  
627 *data sets*. Journal of Cerebral Blood Flow & Metabolism, 1993. **13**(1): p. 5-14.
- 628 7. Jurado, M.B. and M. Rosselli, *The elusive nature of executive functions: a review of our*  
629 *current understanding*. Neuropsychology review, 2007. **17**(3): p. 213-233.
- 630 8. Bullmore, E. and O. Sporns, *The economy of brain network organization*. Nature Reviews  
631 Neuroscience, 2012. **13**(5): p. 336-349.
- 632 9. Bertolero, M.A., B.T. Yeo, and M. D'Esposito, *The diverse club*. Nature communications, 2017.  
633 **8**(1): p. 1-11.
- 634 10. Van Den Heuvel, M.P. and O. Sporns, *Rich-club organization of the human connectome*.  
635 Journal of Neuroscience, 2011. **31**(44): p. 15775-15786.
- 636 11. Caeyenberghs, K., et al., *Dynamics of the human structural connectome underlying working*  
637 *memory training*. Journal of Neuroscience, 2016. **36**(14): p. 4056-4066.
- 638 12. Cole, M.W., et al., *Global connectivity of prefrontal cortex predicts cognitive control and*  
639 *intelligence*. Journal of Neuroscience, 2012. **32**(26): p. 8988-8999.
- 640 13. Takeuchi, H., et al., *Degree centrality and fractional amplitude of low-frequency oscillations*  
641 *associated with Stroop interference*. Neuroimage, 2015. **119**: p. 197-209.
- 642 14. Van Dellen, E., et al., *Connectivity in MEG resting-state networks increases after resective*  
643 *surgery for low-grade glioma and correlates with improved cognitive performance*.  
644 Neuroimage: clinical, 2013. **2**: p. 1-7.
- 645 15. Boccaletti, S., et al., *The structure and dynamics of multilayer networks*. Physics Reports,  
646 2014. **544**(1): p. 1-122.
- 647 16. Boccaletti, S., et al., *Complex networks: Structure and dynamics*. Physics reports, 2006. **424**(4-  
648 5): p. 175-308.
- 649 17. Cardillo, A., et al., *Emergence of network features from multiplexity*. Scientific reports, 2013.  
650 **3**(1): p. 1-6.
- 651 18. Zanin, M., *Can we neglect the multi-layer structure of functional networks?* Physica A:  
652 Statistical Mechanics and its Applications, 2015. **430**: p. 184-192.
- 653 19. Damoiseaux, J.S. and M.D. Greicius, *Greater than the sum of its parts: a review of studies*  
654 *combining structural connectivity and resting-state functional connectivity*. Brain Structure  
655 and Function, 2009. **213**(6): p. 525-533.
- 656 20. Park, H.-J. and K. Friston, *Structural and functional brain networks: from connections to*  
657 *cognition*. Science, 2013. **342**(6158).
- 658 21. Stam, C., et al., *The relation between structural and functional connectivity patterns in*  
659 *complex brain networks*. International Journal of Psychophysiology, 2016. **103**: p. 149-160.
- 660 22. Garcés, P., et al., *Multimodal description of whole brain connectivity: A comparison of resting*  
661 *state MEG, fMRI, and DWI*. Human brain mapping, 2016. **37**(1): p. 20-34.
- 662 23. Mandke, K., et al., *Comparing multilayer brain networks between groups: Introducing graph*  
663 *metrics and recommendations*. NeuroImage, 2018. **166**: p. 371-384.
- 664 24. De Domenico, M., et al., *Mathematical formulation of multilayer networks*. Physical Review  
665 X, 2013. **3**(4): p. 041022.
- 666 25. Kivela, M., et al., *Multilayer networks*. Journal of complex networks, 2014. **2**(3): p. 203-271.



- 667 26. Battiston, F., et al., *Multilayer motif analysis of brain networks*. Chaos: An Interdisciplinary  
668 Journal of Nonlinear Science, 2017. **27**(4): p. 047404.
- 669 27. Brookes, M.J., et al., *A multi-layer network approach to MEG connectivity analysis*.  
670 Neuroimage, 2016. **132**: p. 425-438.
- 671 28. Guillon, J., et al., *Loss of brain inter-frequency hubs in Alzheimer's disease*. Scientific reports,  
672 2017. **7**(1): p. 1-13.
- 673 29. De Domenico, M., S. Sasai, and A. Arenas, *Mapping multiplex hubs in human functional brain  
674 networks*. Frontiers in neuroscience, 2016. **10**: p. 326.
- 675 30. Yu, M., et al., *Selective impairment of hippocampus and posterior hub areas in Alzheimer's  
676 disease: an MEG-based multiplex network study*. Brain, 2017. **140**(5): p. 1466-1485.
- 677 31. Van den Burg, W., R. Saan, and B. Deelman, *15-Woordentest: Provisional Manual*. Groningen:  
678 University Hospital, Department of Neuropsychology, 1985.
- 679 32. Van der Elst, W., et al., *The concept shifting test: Adult normative data*. Psychological  
680 assessment, 2006. **18**(4): p. 424.
- 681 33. Hammes, J.G.W., *De Stroop kleur-woord test*. 1978: Harcourt Test Publ.
- 682 34. Bucks, R. and J.R. Willison, *Development and validation of the Location Learning Test (LLT): a  
683 test of visuo-spatial learning designed for use with older adults and in dementia*. The Clinical  
684 Neuropsychologist, 1997. **11**(3): p. 273-286.
- 685 35. Mulder, J., P. Dekker, and R. Dekker, *Woord-fluency test/figuur-fluency test, handleiding*.  
686 PITS: Leiden, 2006.
- 687 36. Van der Elst, W., et al., *The Letter Digit Substitution Test: normative data for 1,858 healthy  
688 participants aged 24–81 from the Maastricht Aging Study (MAAS): influence of age,  
689 education, and sex*. Journal of clinical and experimental neuropsychology, 2006. **28**(6): p.  
690 998-1009.
- 691 37. Schmand, B., P. Houx, and I. De Koning, *Normen van psychologische tests voor gebruik in de  
692 klinische neuropsychologie*. Sectie Neuropsychologie Nederlands Instituut van Psychologen,  
693 2012.
- 694 38. Verhage, F., *Intelligentie en leeftijd bij volwassenen en bejaarden*. 1964, Van Gorcum Assen.
- 695 39. Andersson, J.L., S. Skare, and J. Ashburner, *How to correct susceptibility distortions in spin-  
696 echo echo-planar images: application to diffusion tensor imaging*. Neuroimage, 2003. **20**(2):  
697 p. 870-888.
- 698 40. Smith, R.E., et al., *Anatomically-constrained tractography: improved diffusion MRI  
699 streamlines tractography through effective use of anatomical information*. Neuroimage,  
700 2012. **62**(3): p. 1924-1938.
- 701 41. Tournier, J.-D., et al., *MRtrix3: A fast, flexible and open software framework for medical  
702 image processing and visualisation*. NeuroImage, 2019. **202**: p. 116137.
- 703 42. Jeurissen, B., et al., *Multi-tissue constrained spherical deconvolution for improved analysis of  
704 multi-shell diffusion MRI data*. NeuroImage, 2014. **103**: p. 411-426.
- 705 43. Smith, R.E., et al., *SIFT2: Enabling dense quantitative assessment of brain white matter  
706 connectivity using streamlines tractography*. Neuroimage, 2015. **119**: p. 338-351.
- 707 44. Fan, L., et al., *The human brainnetome atlas: a new brain atlas based on connectional  
708 architecture*. Cerebral cortex, 2016. **26**(8): p. 3508-3526.
- 709 45. Pruim, R.H., et al., *ICA-AROMA: A robust ICA-based strategy for removing motion artifacts  
710 from fMRI data*. Neuroimage, 2015. **112**: p. 267-277.
- 711 46. Eijlers, A.J., et al., *Increased default-mode network centrality in cognitively impaired multiple  
712 sclerosis patients*. Neurology, 2017. **88**(10): p. 952-960.
- 713 47. Chai, X.J., et al., *Anticorrelations in resting state networks without global signal regression*.  
714 Neuroimage, 2012. **59**(2): p. 1420-1428.
- 715 48. Zhan, L., et al., *The significance of negative correlations in brain connectivity*. Journal of  
716 Comparative Neurology, 2017. **525**(15): p. 3251-3265.
- 717 49. van Klink, N., et al., *Automatic detection and visualisation of MEG ripple oscillations in  
718 epilepsy*. NeuroImage: Clinical, 2017. **15**: p. 689-701.

- 719 50. Taulu, S. and J. Simola, *Spatiotemporal signal space separation method for rejecting nearby*  
720 *interference in MEG measurements*. Physics in Medicine & Biology, 2006. **51**(7): p. 1759.
- 721 51. Whalen, C., et al., *Validation of a method for coregistering scalp recording locations with 3D*  
722 *structural MR images*. Human brain mapping, 2008. **29**(11): p. 1288-1301.
- 723 52. Hillebrand, A., et al., *Frequency-dependent functional connectivity within resting-state*  
724 *networks: an atlas-based MEG beamformer solution*. Neuroimage, 2012. **59**(4): p. 3909-3921.
- 725 53. Hillebrand, A., et al., *Direction of information flow in large-scale resting-state networks is*  
726 *frequency-dependent*. Proceedings of the National Academy of Sciences, 2016. **113**(14): p.  
727 3867-3872.
- 728 54. Stam, C.J., G. Nolte, and A. Daffertshofer, *Phase lag index: assessment of functional*  
729 *connectivity from multi channel EEG and MEG with diminished bias from common sources*.  
730 Human brain mapping, 2007. **28**(11): p. 1178-1193.
- 731 55. Kruskal, J.B., *On the shortest spanning subtree of a graph and the traveling salesman*  
732 *problem*. Proceedings of the American Mathematical society, 1956. **7**(1): p. 48-50.
- 733 56. Stam, C., et al., *The trees and the forest: characterization of complex brain networks with*  
734 *minimum spanning trees*. International Journal of Psychophysiology, 2014. **92**(3): p. 129-138.
- 735 57. Tewarie, P., et al., *The minimum spanning tree: an unbiased method for brain network*  
736 *analysis*. Neuroimage, 2015. **104**: p. 177-188.
- 737 58. Tewarie, P., et al., *Functional brain network analysis using minimum spanning trees in*  
738 *Multiple Sclerosis: an MEG source-space study*. Neuroimage, 2014. **88**: p. 308-318.
- 739 59. Fagerholm, E.D., et al., *Disconnection of network hubs and cognitive impairment after*  
740 *traumatic brain injury*. Brain, 2015. **138**(6): p. 1696-1709.
- 741 60. Hardmeier, M., et al., *Cognitive dysfunction in early multiple sclerosis: altered centrality*  
742 *derived from resting-state functional connectivity using magneto-encephalography*. PLoS  
743 One, 2012. **7**(7): p. e42087.
- 744 61. Fornito, A., A. Zalesky, and E. Bullmore, *Fundamentals of brain network analysis*. 2016:  
745 Academic Press.
- 746 62. Vriend, C., et al., *Global and subnetwork changes of the structural connectome in de novo*  
747 *Parkinson's disease*. Neuroscience, 2018. **386**: p. 295-308.
- 748 63. Yeo, B.T., et al., *The organization of the human cerebral cortex estimated by intrinsic*  
749 *functional connectivity*. Journal of neurophysiology, 2011.
- 750 64. Bianconi, G., *Multilayer networks: structure and function*. 2018: Oxford university press.
- 751 65. Solé-Ribalta, A., et al., *Spectral properties of the Laplacian of multiplex networks*. Physical  
752 Review E, 2013. **88**(3): p. 032807.
- 753 66. Hagberg, A., P. Swart, and D. S Chult, *Exploring network structure, dynamics, and function*  
754 *using NetworkX*. 2008, Los Alamos National Lab.(LANL), Los Alamos, NM (United States).
- 755 67. De Domenico, M., M.A. Porter, and A. Arenas, *MuxViz: a tool for multilayer analysis and*  
756 *visualization of networks*. Journal of Complex Networks, 2015. **3**(2): p. 159-176.
- 757 68. Hwang, K., M.N. Hallquist, and B. Luna, *The development of hub architecture in the human*  
758 *functional brain network*. Cerebral Cortex, 2013. **23**(10): p. 2380-2393.
- 759 69. Cao, M., et al., *Topological organization of the human brain functional connectome across*  
760 *the lifespan*. Developmental cognitive neuroscience, 2014. **7**: p. 76-93.
- 761 70. Onoda, K. and S. Yamaguchi, *Small-worldness and modularity of the resting-state functional*  
762 *brain network decrease with aging*. Neuroscience letters, 2013. **556**: p. 104-108.
- 763 71. Hedman, A.M., et al., *Human brain changes across the life span: a review of 56 longitudinal*  
764 *magnetic resonance imaging studies*. Human brain mapping, 2012. **33**(8): p. 1987-2002.
- 765 72. Ge, Y., et al., *Age-related total gray matter and white matter changes in normal adult brain.*  
766 *Part I: volumetric MR imaging analysis*. American journal of neuroradiology, 2002. **23**(8): p.  
767 1327-1333.
- 768 73. Walhovd, K.B., et al., *Effects of age on volumes of cortex, white matter and subcortical*  
769 *structures*. Neurobiology of aging, 2005. **26**(9): p. 1261-1270.

- 770 74. Trojano, M., et al., *Age-related disability in multiple sclerosis*. Annals of Neurology: Official  
771 Journal of the American Neurological Association and the Child Neurology Society, 2002.  
772 **51**(4): p. 475-480.
- 773 75. Hebert, L.E., et al., *Age-specific incidence of Alzheimer's disease in a community population*.  
774 Jama, 1995. **273**(17): p. 1354-1359.
- 775 76. Clune, J., J.-B. Mouret, and H. Lipson, *The evolutionary origins of modularity*. Proceedings of  
776 the Royal Society b: Biological sciences, 2013. **280**(1755): p. 20122863.
- 777 77. Sporns, O., *Network attributes for segregation and integration in the human brain*. Current  
778 opinion in neurobiology, 2013. **23**(2): p. 162-171.
- 779 78. He, W., et al., *Increased segregation of functional networks in developing brains*.  
780 NeuroImage, 2019. **200**: p. 607-620.
- 781 79. Honey, C.J., J.-P. Thivierge, and O. Sporns, *Can structure predict function in the human brain?*  
782 Neuroimage, 2010. **52**(3): p. 766-776.
- 783 80. Honey, C.J., et al., *Predicting human resting-state functional connectivity from structural*  
784 *connectivity*. Proceedings of the National Academy of Sciences, 2009. **106**(6): p. 2035-2040.
- 785 81. Sahneh, F.D. and C. Scoglio, *Competitive epidemic spreading over arbitrary multilayer*  
786 *networks*. Physical Review E, 2014. **89**(6): p. 062817.
- 787 82. Casiraghi, G., *Multiplex Network Regression: How do relations drive interactions?* arXiv  
788 preprint arXiv:1702.02048, 2017.
- 789 83. Tewarie, P.K., et al., *Interlayer connectivity reconstruction for multilayer brain networks using*  
790 *phase oscillator models*. New Journal of Physics, 2021.
- 791 84. Brookes, M.J., et al., *Investigating the electrophysiological basis of resting state networks*  
792 *using magnetoencephalography*. Proceedings of the National Academy of Sciences, 2011.  
793 **108**(40): p. 16783-16788.
- 794 85. Marek, S. and N.U. Dosenbach, *The frontoparietal network: function, electrophysiology, and*  
795 *importance of individual precision mapping*. Dialogues in clinical neuroscience, 2018. **20**(2): p.  
796 133.
- 797 86. Stam, C.v. and E. Van Straaten, *The organization of physiological brain networks*. Clinical  
798 neurophysiology, 2012. **123**(6): p. 1067-1087.
- 799 87. Van Den Heuvel, M.P., et al., *Efficiency of functional brain networks and intellectual*  
800 *performance*. Journal of Neuroscience, 2009. **29**(23): p. 7619-7624.
- 801 88. Schoonheim, M.M., K.A. Meijer, and J.J. Geurts, *Network collapse and cognitive impairment*  
802 *in multiple sclerosis*. Frontiers in neurology, 2015. **6**: p. 82.
- 803 89. Hillary, F.G., et al., *Hyperconnectivity is a fundamental response to neurological disruption*.  
804 Neuropsychology, 2015. **29**(1): p. 59.

805
